# Supplementary material
Source: HighWire-hosted journal article supplement (https://erj.ersjournals.com/content/57/1/2002208)
Supplement: inline-supplementary-material-1 [file inline-supplementary-material-1.pdf]

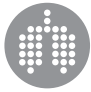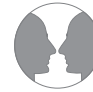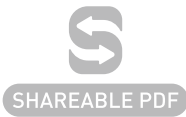

# Chronic thromboembolic pulmonary hypertension and totally implantable central venous access systems

Mitja Jevnikar<sup>1,2,3</sup>, David Montani <sup>1,2,3</sup>, Laurent Savale <sup>1,2,3</sup>,  
Andrei Seferian<sup>1,2,3</sup>, Etienne-Marie Jutant<sup>1,2,3</sup>, Athénaïs Boucly<sup>1,2,3</sup>,  
Mariana Preda<sup>1,2,3</sup>, Jason Weatherald <sup>4,5</sup>, Sophie Bulifon<sup>1,2,3</sup>,  
Florence Parent<sup>1,2,3</sup>, Philippe Brenot<sup>1,2,6</sup>, Elie Fadel<sup>1,2,7</sup>, Olivier Sitbon <sup>1,2,3</sup>,  
Gérald Simonneau<sup>1,2,3</sup>, Marc Humbert <sup>1,2,3,8</sup> and Xavier Jaïs<sup>1,2,3,8</sup>

**Affiliations:** <sup>1</sup>Université Paris-Saclay, Faculty of Medicine, Le Kremlin-Bicêtre, France. <sup>2</sup>INSERM UMR\_S 999, "Pulmonary Hypertension: Pathophysiology and Novel Therapies", Hôpital Marie Lannelongue, Le Plessis-Robinson, France. <sup>3</sup>Assistance Publique - Hôpitaux de Paris (AP-HP), Dept of Respiratory and Intensive Care Medicine, Pulmonary Hypertension National Referral Center, Hôpital Bicêtre, Le Kremlin-Bicêtre, France. <sup>4</sup>Dept of Medicine, Division of Respiriology, University of Calgary, Calgary, AB, Canada. <sup>5</sup>Libin Cardiovascular Institute, Calgary, AB, Canada. <sup>6</sup>Dept of Radiology, Hôpital Marie Lannelongue, Le Plessis-Robinson, France. <sup>7</sup>Dept of Thoracic and Vascular Surgery and Heart-Lung Transplantation, Hôpital Marie Lannelongue, Le Plessis-Robinson, France. <sup>8</sup>These authors contributed equally.

**Correspondence:** Xavier Jaïs, Service de pneumologie, Le Kremlin-Bicêtre, France, 78 rue du général Leclerc, 94270 Le Kremlin Bicêtre, France. E-mail: xavier.jais@gmail.com

 @ERSpublications

**Long-term TICVAS implantation may contribute to the development of CTEPH and have a negative impact on perioperative survival after PEA. Clinicians should be aware of this potential late complication of TICVAS.** <https://bit.ly/2OmonHZ>

**Cite this article as:** Jevnikar M, Montani D, Savale L, *et al.* Chronic thromboembolic pulmonary hypertension and totally implantable central venous access systems. *Eur Respir J* 2021; 57: 2002208 [<https://doi.org/10.1183/13993003.02208-2020>].

This single-page version can be shared freely online.

## To the Editor:

Chronic thromboembolic pulmonary hypertension (CTEPH) is caused by obstruction of the pulmonary arteries by unresolved, organised thrombi, with a concurrent microvasculopathy [1–3]. Several medical conditions are associated with the development of CTEPH, including lupus anticoagulant/antiphospholipid antibodies, splenectomy, chronic inflammatory disorders, cancer, ventriculoatrial shunts and infected cardiac pacemakers [3–5]. Patients with a clinical history of totally implantable central venous access systems (TICVAS) and CTEPH have been reported in expert CTEPH centres, but published data on this association are lacking. TICVAS are used for chronic intravenous treatment and for patients who require long-term intermittent vascular access. The main complications related to TICVAS are infection, thrombosis, catheter obstruction and migration [6]. Port-associated bloodstream infections are the most common complications, occurring in 5.6–8% of cases, with the primary microbiological pathogens isolated being *Staphylococcus epidermidis* and *Staphylococcus aureus* [6, 7].
